# Supplementary material for: Genetic Characterization of the Exceptionally High Heat Resistance of the Non-toxic Surrogate Clostridium sporogenes PA 3679
Source: Front Microbiol. 2017 Apr 3;8:545. doi: 10.3389/fmicb.2017.00545 (PMC5376575; doi:10.3389/fmicb.2017.00545)
Supplement: Supplementary file 1 [file Table1.XLSX]

## Sheet: Spore genes
Supplementary Table T1. Sporulation-related sequences used in this study.
Gene	Property	Protein	Species	Function/Similarity	Accession	Promoter	1961-2	1961-4	1990	2007	Camp	FDA	NFL	UW	ATCC 3502
	DNA protection spore core
ssp1	a/b type	SASP	Clostridium perfingens SM101	DNA bind	X59480.1	spo0A
ssp2	a/b type	SASP	Clostridium perfingens SM101	DNA bind	X59481.1	spo0A
ssp3	a/b type	SASP	Clostridium perfingens SM101	DNA bind	X59482.1	sigmaG
ssp4		SASP	Clostridium perfingens SM101	DNA bind	ABG87200.1	sigmaG
sspA	a/b type	SASP	Clostridium acetobutylicum ATCC 824	DNA bind	CA_C2365	sigmaG
sspB	a/b type	SASP	Clostridium acetobutylicum ATCC 824	DNA bind	CA_C1522	sigmaG
sspD	a/b type	SASP	Clostridium acetobutylicum ATCC 824	DNA bind	CA_C1620	sigmaG
sspF	minor	SASP	Clostridium acetobutylicum ATCC 824	DNA bind	CA_C2372	sigmaG
sspH	minor	SASP	Clostridium acetobutylicum ATCC 824	DNA bind	CA_C1663	sigmaG
tlp	minor	SASP	Clostridium acetobutylicum ATCC 824		CA_C1487	sigmaF
sspA	alpha	SASP	Bacillus subtilis subsp. subtilis str. 168	DNA bind	NP_390835.1, BSU29570	spo0A
sspB	beta	SASP	Bacillus subtilis subsp. subtilis str. 168	DNA bind	NP_388856.1, BSU09750	spo0A
sspC	minor a/b type	SASP	Bacillus subtilis subsp. subtilis str. 168	DNA bind	NP_389876.1, BSU19950	spo0A
sspD	minor a/b type	SASP	Bacillus subtilis subsp. subtilis str. 168	DNA bind	NP_389230.1, BSU13470	spo0A
sspE	gamma	SASP	Bacillus subtilis subsp. subtilis str. 168	amino acid supply	NP_388746.1, BSU08660	spo0A
sspF	minor a/b type	SASP	Bacillus subtilis subsp. subtilis str. 168	OE outgrowth delay	NP_387926.1, BSU00450	sigmaG
sspG	minor, not spore core	SASP	Bacillus subtilis subsp. subtilis str. 168	mother cell specific spoIVCB	YP_054592.1, BSU32640	sigmaK, gerE
sspH	minor, no spore change	SASP	Bacillus subtilis subsp. subtilis str. 168	forespore specific spoIIIG, spoIIAC	NP_388692.1, BSU08110	sigmaG, sigmaF
sspI	minor, delayed spore outgrowth	SASP	Bacillus subtilis subsp. subtilis str. 168	forespore specific spoIIIG	NP_390744.1, BSU28660	sigmaG
sspJ	minor, delayed spore outgrowth	SASP	Bacillus subtilis subsp. subtilis str. 168	forespore specific spoIIIG, spoIIAC	YP_054593.1, BSU33340	sigmaG, sigmaF
sspK	minor, no spore change	SASP	Bacillus subtilis subsp. subtilis str. 168	forespore specific spoIIIG	YP_054573.1, BSU08550	sigmaG
sspL	minor, no spore change	SASP	Bacillus subtilis subsp. subtilis str. 168	forespore specific spoIIIG, spoIIAC	YP_054584.1, BSU22000	sigmaG, sigmaF
sspM	minor, no spore change	SASP	Bacillus subtilis subsp. subtilis str. 168	forespore specific spoIIIG	YP_054585.1, BSU22290	sigmaG
sspN	minor, no spore change	SASP	Bacillus subtilis subsp. subtilis str. 168	dicistronic w/ tlp, forespore specific spoIIIG, spoIIAC	YP_054579.2, BSU18020	sigmaG=sigmaF
tlp	minor, no spore change	SASP	Bacillus subtilis subsp. subtilis str. 168	dicistronic w/ sspN, c, spoIIAC	NP_389685.1, BSU18030	sigmaG=sigmaF
sspO	minor, no spore change	SASP	Bacillus subtilis subsp. subtilis str. 168	dicistronic w/ sspP, forespore specific spoIIIG	NP_389682.1, BSU17990	sigmaG
sspP	minor, no spore change	SASP	Bacillus subtilis subsp. subtilis str. 168	dicistronic w/ sspO, forespore specific spoIIIG	NP_389681.1, BSU17980	sigmaG
ssp	minor	SASP	Clostridium botulinum A1 str. CFSAN002368	no protease or DNA binding domains	EPS53151
ssp1	a/b type	SASP	Clostridium sporogenes PA 3679				VT96_0206570	VT95_19570	VT94_31960	VT93_0231370	VT92_0215520	VT91_32630	VT28_24640	WG71_33180	CBO1790
ssp2	a/b type	SASP	Clostridium sporogenes PA 3679				VT96_0206580	VT95_19560	VT94_31970	VT93_0231380	VT92_0215530	VT91_32640	VT28_24630	WG71_33190	CBO1789
ssp3	a/b type	SASP	Clostridium sporogenes PA 3679				VT96_0204960	VT95_32470	VT94_36900	VT93_0211140	VT92_0229770	VT91_18590	VT28_32290	WG71_22160	CBO3048
ssp4		SASP	Clostridium sporogenes PA 3679				VT96_0225270	VT95_34870	VT94_15410	VT93_0210430	VT92_0204680	VT91_34960	VT28_22550	WG71_12910	CBO3145
ssp5	minor	SASP	Clostridium sporogenes PA 3679				VT96_0231370	VT95_05760	VT94_30490	VT93_0214310	VT92_0221540	VT91_23340	VT28_08540	WG71_28950	CBO2761A
tlp	minor	SASP	Clostridium sporogenes PA 3679				VT96_0210610	VT95_33160	VT94_18040	VT93_0220830	VT92_0202680	VT91_27780	VT28_13750	WG71_06410	CBO1034
sspH_1	H-type small acid soluble protein	SASP	Clostridium sporogenes PA 3679				VT96_0208440	VT95_28930	VT94_38660	VT93_0218660	VT92_0226800	VT91_17160	VT28_37120	WG71_27560	CBO1236
sspH_2	H-type small acid soluble protein	SASP	Clostridium sporogenes PA 3679				VT96_0212970	VT95_03440	VT94_20400	VT93_0223180	VT92_0202340	VT91_04400	VT28_30480	WG71_15320	CBO0789
	Core water content
dpaA	dipicolinate synthase subunit A		Peptoclostridium difficile 630	DPA make, spoVF operon	CD630_29680	sigmaK	x	x	x	x	x	x	x	x
dpaB	dipicolinate synthase subunit B		Peptoclostridium difficile 630	DPA make, spoVF operon	CD630_29670	sigmaK	x	x	x	x	x	x	x	x
spoVFA	dipicolinate synthase subunit A		Bacillus subtilis subsp. subtilis str. 168	DPA make, spoVF operon	NP_389555.1, BSU16730	sigmaK	x	x	x	x	x	x	x	x
spoVFB	dipicolinate synthase subunit B		Bacillus subtilis subsp. subtilis str. 168	DPA make, spoVF operon	NP_389556.1, BSU16740	sigmaK	x	x	x	x	x	x	x	x
etfA	dipicolinate synthase		Clostridium perfingens SM101	putative alternate to spoVF	WP_003454260.1, CPR_2284
etfA_1	etfA-like		Clostridium sporogenes PA 3679	most like etfA 2e-147			VT96_0224380	VT95_11560	VT94_03770	VT93_0200120	VT92_0234660	VT91_19130	VT28_07480	WG71_19680	CBO3197
etfA_2	etfA-like		Clostridium sporogenes PA 3679	2nd like etfA 1e-133			VT96_0224030	VT95_07930	VT94_29130	VT93_0228990	VT92_0214230	VT91_20610	VT28_18680	WG71_36860	CBO3286
etfA_3	etfA-like		Clostridium sporogenes PA 3679	3rd like etfA 4e-129			VT96_0220710	VT95_16280	VT94_15780	VT93_0235660	VT92_0205390	VT91_15040	VT28_23540	WG71_16770	CBO2194
dapA	dihydrodipicolinate synthase		Clostridium sporogenes PA 3679				VT96_0225340	VT95_34800	VT94_15480	VT93_0210500	VT92_0204610	VT91_34890	VT28_22480	WG71_12840	CBO3152
dapB	4-hydroxy-tetrahydrodipicolinate reductase		Clostridium sporogenes PA 3679				VT96_0225350	VT95_34790	VT94_15490	VT93_0210510	VT92_0204600	VT91_34880	VT28_22470	WG71_12830	CBO3153
dapB2	4-hydroxy-tetrahydrodipicolinate reductase		Clostridium sporogenes PA 3679				VT96_0212950	VT95_17270	VT94_20380	VT93_0223160	VT92_0228380	VT91_11570	VT28_09440	WG71_05000	CBO0791
spoVAA	stage V sporulation protein AA		Bacillus subtilis subsp. subtilis str. 168	spoVA operon	NP_390225.2, BSU23440	sigmaG	x	x	x	x	x	x	x	x
spoVAB	stage V sporulation protein AB		Bacillus subtilis subsp. subtilis str. 168	spoVA operon	NP_390224.1, BSU23430	sigmaG	x	x	x	x	x	x	x	x
spoVAC	stage V sporulation protein AC		Bacillus subtilis subsp. subtilis str. 168	spoVA operon; mechanosensitive channel	NP_390223.1, BSU23420	sigmaG
spoVAD	stage V sporulation protein AD		Bacillus subtilis subsp. subtilis str. 168	spoVA operon; high affinity binding to DPA	NP_390222.1, BSU23410	sigmaG
spoVAEa	stage V sporulation protein AEa		Bacillus subtilis subsp. subtilis str. 168	spoVA operon	YP_003097758.1, BSU23401	sigmaG
spoVAEb	stage V sporulation protein AEb		Bacillus subtilis subsp. subtilis str. 168	spoVA operon	YP_003097759.1, BSU23402	sigmaG
spoVAF	stage V sporulation protein AF		Bacillus subtilis subsp. subtilis str. 168	spoVA operon	NP_390220.2, BSU23390	sigmaG
spoVAC	stage V sporulation protein AC		Clostridium acetobutylicum ATCC 824	spoVA operon; mechanosensitive channel	NP_348921.1, CA_C2305	sigmaG
spoVAD	stage V sporulation protein AD		Clostridium acetobutylicum ATCC 824	spoVA operon; high affinity binding to DPA	NP_348920.1, CA_C2304	sigmaG
spoVAEb	stage V sporulation protein AEb		Peptoclostridium difficile 630	spoVA operon	YP_001087252.1, CD630_07750	sigmaG
spoVAC	stage V sporulation protein AC		Clostridium sporogenes PA 3679	spoVA operon; mechanosensitive channel			VT96_0200280	VT95_32080	VT94_29910	VT93_0202880	VT92_0229380	VT91_18200	VT28_31900	WG71_21770	CBO3086
spoVAD	stage V sporulation protein AD		Clostridium sporogenes PA 3679	spoVA operon; high affinity binding to DPA			VT96_0200290	VT95_32090	VT94_29920	VT93_0202890	VT92_0229390	VT91_18210	VT28_31910	WG71_21780	CBO3085
spoVAEb	stage V sporulation protein AEb		Clostridium sporogenes PA 3679	spoVA operon			VT96_0200300	VT95_32100	VT94_29930	VT93_0202900	VT92_0229400	VT91_18220	VT28_31920	WG71_21790	CBO3084
spoVA2_DUF1657	hypothetical protein DUF1657		Clostridium sporogenes PA 3679	spoVA2 operon; DUF1657			x	VT95_24860	x	x	VT92_0210390	VT91_08840	VT28_35690	WG71_04800	x
spoVA2_mem	membrane protein YcaP		Clostridium sporogenes PA 3679	spoVA2 operon; DUF1657+YcaP			x	VT95_24850	x	x	VT92_0210380	VT91_08830	VT28_35680	WG71_04790	x
spoVAC_2	stage V sporulation protein AC		Clostridium sporogenes PA 3679	spoVA2 operon; mechanosensitive channel			x	VT95_24840	x	x	VT92_0210370	VT91_08820	VT28_35670	WG71_04780	x
spoVAD_2	stage V sporulation protein AD		Clostridium sporogenes PA 3679	spoVA2 operon; high affinity binding to DPA			x	VT95_24830	x	x	VT92_0210360	VT91_08810	VT28_35660	WG71_04770	x
spoVAEb_2	stage V sporulation protein AEb		Clostridium sporogenes PA 3679	spoVA2 operon			x	VT95_24820	x	x	VT92_0210350	VT91_08800	VT28_35650	WG71_04760	x
spoVAmob_DUF1657_1	hypothetical protein DUF1657		Bacillus subtilis subsp. subtilis str. 168 B4146	spoVAmob operon; DUF1657	B4146_1174
spoVAmob_hypo?			Bacillus subtilis subsp. subtilis str. 168 B4146	spoVAmob operon	B4146_1175
spoVACmob	stage V sporulation protein AC		Bacillus subtilis subsp. subtilis str. 168 B4146	spoVAmob operon; mechanosensitive channel	B4146_1176
spoVADmob	stage V sporulation protein AD		Bacillus subtilis subsp. subtilis str. 168 B4146	spoVAmob operon; high affinity binding to DPA	B4146_1177
spoVAEbmob	stage V sporulation protein AEb		Bacillus subtilis subsp. subtilis str. 168 B4146	spoVAmob operon	B4146_1178
spoVAmob_DUF1657_2	hypothetical protein DUF1657		Bacillus subtilis subsp. subtilis str. 168 B4146	spoVAmob operon; DUF1657	B4146_1178a
spoVAmob_mem	membrane protein YcaP		Bacillus subtilis subsp. subtilis str. 168 B4146	spoVAmob operon; DUF1657+YcaP	B4146_1179
dacA	peptidoglycan crosslinking		Bacillus subtilis subsp. subtilis str. 168	monocistronic	NP_387891.1, BSU00100
dacB	peptidoglycan crosslinking		Bacillus subtilis subsp. subtilis str. 168	tricsitronic w/ spmAB	NP_390200.1, BSU23190	sigmaE
dacC	peptidoglycan crosslinking		Bacillus subtilis subsp. subtilis str. 168		NP_389717.1, BSU18350
dacF	peptidoglycan crosslinking		Bacillus subtilis subsp. subtilis str. 168	upstream of spoIIA operon	NP_390229.1, BSU23480	sigmaF
dacB	peptidoglycan crosslinking		Clostridium botulinum A str. ATCC 3502		YP_001254354.1
dacF	peptidoglycan crosslinking		Clostridium botulinum A str. ATCC 3502		YP_001254360.1
dac1	peptidoglycan crosslinking		Clostridium sporogenes PA 3679	no blast similarity			VT96_0214660	VT95_01590	VT94_22100	VT93_0224880	VT92_0200470	VT91_02530	VT28_28620	WG71_13450	CBO1033
dac2	peptidoglycan crosslinking		Clostridium sporogenes PA 3679	most like dacB 3e-51			VT96_0233530	VT95_15110	VT94_37640	VT93_0211870	VT92_0232320	VT91_25100	VT28_21350	WG71_31390	CBO2979
dac3	peptidoglycan crosslinking		Clostridium sporogenes PA 3679	3rd like dacB 7e-31			VT96_0236920	VT95_20640	VT94_01150	VT93_0216700	VT92_0207450	VT91_05930	VT28_10670	WG71_10900	CBO1404
dac4	peptidoglycan crosslinking		Clostridium sporogenes PA 3679	most like dacF 1e-105			VT96_0205860	VT95_00900	VT94_39350	VT93_0230660	VT92_0214760	VT91_31870	VT28_07700	WG71_32420	CBO1859
dac5	peptidoglycan crosslinking		Clostridium sporogenes PA 3679	2nd like dacB 8e-51			VT96_0205910	VT95_00840	VT94_39400	VT93_0230710	VT92_0214820	VT91_31930	VT28_07640	WG71_32480	CBO1853
dac6	peptidoglycan crosslinking		Clostridium sporogenes PA 3679	no blast similarity			VT96_0210620	VT95_33150	VT94_18050	VT93_0220840	VT92_0202670	VT91_27790	VT28_13740	WG71_06400	CBO0609
spmA	spore maturation protein A		Clostridium botulinum A str. ATCC 3502	core dehydration	YP_001252619.1, CBO0070	sigmaE	VT96_0204040	VT95_22320	VT94_08090	VT93_0207650	VT92_0207850	VT91_06300	VT28_33150	WG71_02260	CBO0070
spmB	spore maturation protein B		Clostridium botulinum A str. ATCC 3502	core dehydration	YP_001252620.1, CBO0071	sigmaE	VT96_0204030	VT95_22330	VT94_08100	VT93_0207660	VT92_0207860	VT91_06310	VT28_33160	WG71_02270	CBO0071
gpr	germination protease	GPR	Bacillus subtilis subsp. subtilis str. 168	SASP protease	BSU25540, NP_390432.1	sigmaF
gpr	germination protease	GPR	Clostridium acetobutylicum ATCC 824	SASP protease	NP_347906.1, CA_C1275	sigmaG	VT96_0233390	VT95_26980	VT94_37780	VT93_0212010	VT92_0232450	VT91_25230	VT28_21480	WG71_31520	CBO2966
yyaC	putative germination protease		Clostridium acetobutylicum ATCC 824	SASP protease	CA_C2857	sigmaF	VT96_0203120	VT95_23240	VT94_09010	VT93_0208570	VT92_0208770	VT91_07220	VT28_34070	WG71_03180	CBO0164
	DNA repair of SP (T_T adduct)
spl, splB	spore photoproduct lyase		Clostridium botulinum A str. ATCC 3502	T_T repair	YP_001252760.1, CBO0216		VT96_0202570	VT95_23960	VT94_09560	VT93_0209120	VT92_0209490	VT91_07940	VT28_34790	WG71_03900	CBO0216
